# Supplementary material for: Programmable Shunt Valves for Pediatric Hydrocephalus: 22-Year Experience from a Singapore Children’s Hospital
Source: MDPI journal article supplement (doi:10.3390/brainsci11111548), 2021-11-22
Supplement: s1 [file s1]

## Supplementary Figures:

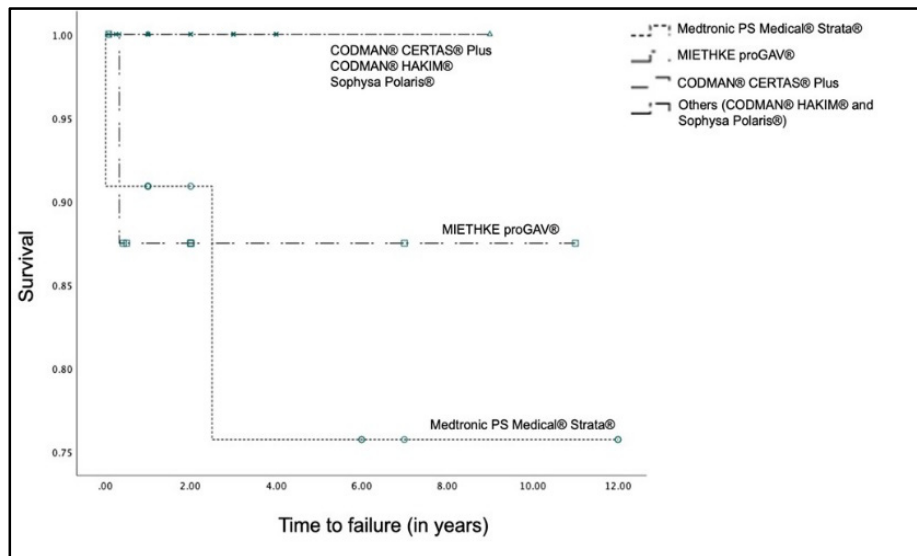

**Figure S1.** Failure-free survival compared between types of PSV.

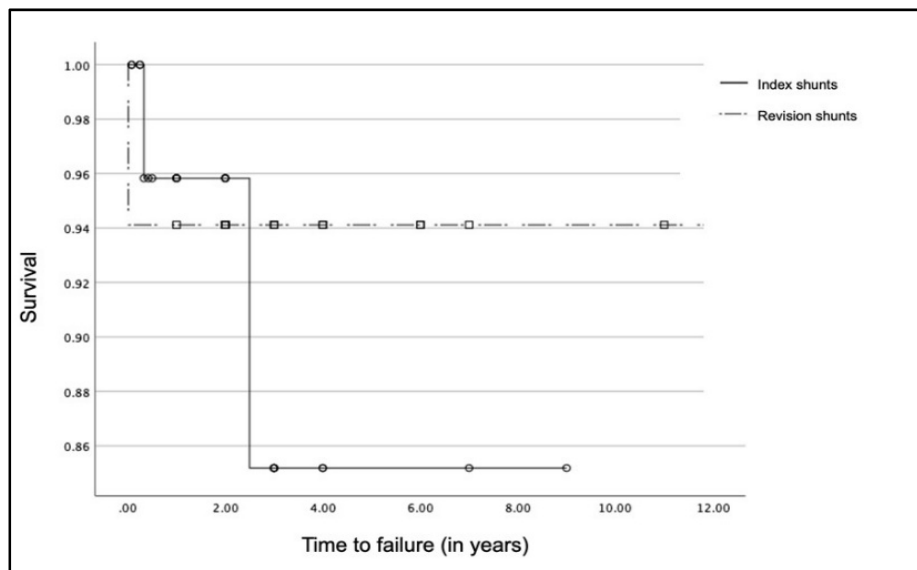

**Figure S2.** Failure-free survival comparison between index versus revision shunts.

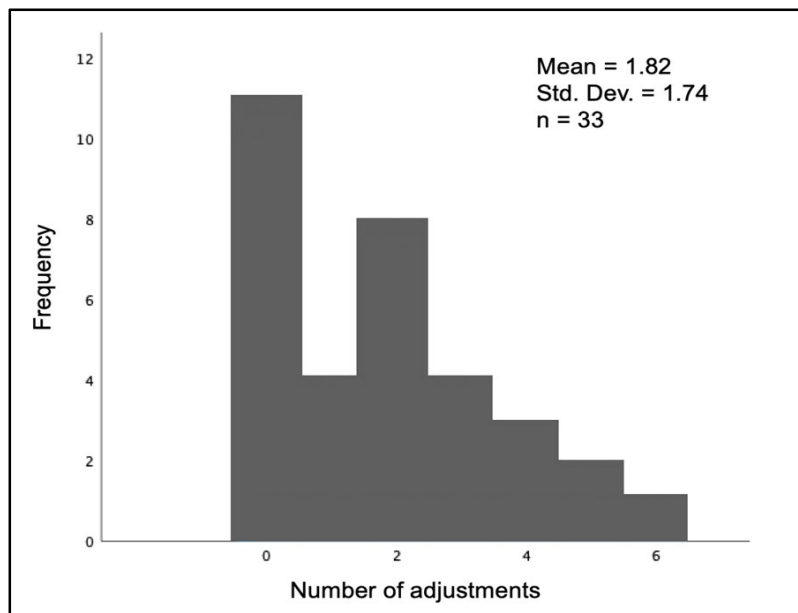

**Figure S3.** Histogram of frequency of PSV opening pressure adjustments.
